# Supplementary material for: Cranial variability and differentiation among golden jackals (Canis aureus) in Europe, Asia Minor and Africa
Source: Zookeys. 2020 Mar 9;917:141–64. doi: 10.3897/zookeys.917.39449 (PMC7076067; doi:10.3897/zookeys.917.39449)
Supplement: Supplementary material 1 [file zookeys-917-141-s001.xlsx]

## Sheet: Sheet1
Number	Museum housed	Source	Catalogue number	Collector's number	Collector	Species identification	Country	Continent	Sex
1	University of Forestry, Sofia	Personally measured	1	1	Stoyan Stoyanov	Canis aureus	Bulgaria	Europe	Male
2	University of Forestry, Sofia	Personally measured	2	2	Stoyan Stoyanov	Canis aureus	Bulgaria	Europe	Male
3	University of Forestry, Sofia	Personally measured	3	3	Stoyan Stoyanov	Canis aureus	Bulgaria	Europe	Female
4	University of Forestry, Sofia	Personally measured	4	4	Stoyan Stoyanov	Canis aureus	Bulgaria	Europe	Male
5	University of Forestry, Sofia	Personally measured	5	5	Stoyan Stoyanov	Canis aureus	Bulgaria	Europe	Female
6	University of Forestry, Sofia	Personally measured	6	6	Stoyan Stoyanov	Canis aureus	Bulgaria	Europe	Female
7	University of Forestry, Sofia	Personally measured	7	7	Stoyan Stoyanov	Canis aureus	Bulgaria	Europe	Male
8	University of Forestry, Sofia	Personally measured	8	8	Stoyan Stoyanov	Canis aureus	Bulgaria	Europe	Male
9	University of Forestry, Sofia	Personally measured	9	9	Stoyan Stoyanov	Canis aureus	Bulgaria	Europe	Male
10	University of Forestry, Sofia	Personally measured	10	10	Stoyan Stoyanov	Canis aureus	Bulgaria	Europe	Male
11	University of Forestry, Sofia	Personally measured	11	11	Stoyan Stoyanov	Canis aureus	Bulgaria	Europe	Male
12	University of Forestry, Sofia	Personally measured	12	12	Stoyan Stoyanov	Canis aureus	Bulgaria	Europe	Male
13	University of Forestry, Sofia	Personally measured	13	13	Stoyan Stoyanov	Canis aureus	Bulgaria	Europe	Female
14	University of Forestry, Sofia	Personally measured	16	16	Stoyan Stoyanov	Canis aureus	Bulgaria	Europe	Male
15	University of Forestry, Sofia	Personally measured	17	17	Stoyan Stoyanov	Canis aureus	Bulgaria	Europe	Female
16	University of Forestry, Sofia	Personally measured	18	18	Stoyan Stoyanov	Canis aureus	Bulgaria	Europe	Male
17	University of Forestry, Sofia	Personally measured	19	19	Stoyan Stoyanov	Canis aureus	Bulgaria	Europe	Female
18	University of Forestry, Sofia	Personally measured	20	20	Stoyan Stoyanov	Canis aureus	Bulgaria	Europe	Female
19	University of Forestry, Sofia	Personally measured	21	21	Stoyan Stoyanov	Canis aureus	Bulgaria	Europe	Female
20	University of Forestry, Sofia	Personally measured	22	22	Stoyan Stoyanov	Canis aureus	Bulgaria	Europe	Female
21	University of Forestry, Sofia	Personally measured	23	23	Stoyan Stoyanov	Canis aureus	Bulgaria	Europe	Female
22	University of Forestry, Sofia	Personally measured	24	24	Stoyan Stoyanov	Canis aureus	Bulgaria	Europe	Male
23	University of Forestry, Sofia	Personally measured	25	25	Stoyan Stoyanov	Canis aureus	Bulgaria	Europe	Female
24	University of Forestry, Sofia	Personally measured	26	26	Stoyan Stoyanov	Canis aureus	Bulgaria	Europe	Female
25	University of Forestry, Sofia	Personally measured	27	27	Stoyan Stoyanov	Canis aureus	Bulgaria	Europe	Female
26	University of Forestry, Sofia	Personally measured	28	28	Stoyan Stoyanov	Canis aureus	Bulgaria	Europe	Male
27	University of Forestry, Sofia	Personally measured	29	29	Stoyan Stoyanov	Canis aureus	Bulgaria	Europe	Male
28	University of Forestry, Sofia	Personally measured	30	30	Stoyan Stoyanov	Canis aureus	Bulgaria	Europe	Male
29	University of Forestry, Sofia	Personally measured	31	31	Stoyan Stoyanov	Canis aureus	Bulgaria	Europe	Male
30	University of Forestry, Sofia	Personally measured	32	32	Stoyan Stoyanov	Canis aureus	Bulgaria	Europe	Female
31	University of Forestry, Sofia	Personally measured	33	33	Stoyan Stoyanov	Canis aureus	Bulgaria	Europe	Female
32	University of Forestry, Sofia	Personally measured	34	34	Stoyan Stoyanov	Canis aureus	Bulgaria	Europe	Female
33	University of Forestry, Sofia	Personally measured	35	35	Stoyan Stoyanov	Canis aureus	Bulgaria	Europe	Female
34	University of Forestry, Sofia	Personally measured	36	36	Stoyan Stoyanov	Canis aureus	Bulgaria	Europe	Female
35	University of Forestry, Sofia	Personally measured	37	37	Stoyan Stoyanov	Canis aureus	Bulgaria	Europe	Female
36	University of Forestry, Sofia	Personally measured	38	38	Stoyan Stoyanov	Canis aureus	Bulgaria	Europe
37	University of Forestry, Sofia	Personally measured	39	39	Stoyan Stoyanov	Canis aureus	Bulgaria	Europe	Female
38	University of Forestry, Sofia	Personally measured	40	40	Stoyan Stoyanov	Canis aureus	Bulgaria	Europe	Female
39	University of Forestry, Sofia	Personally measured	41	41	Stoyan Stoyanov	Canis aureus	Bulgaria	Europe	Male
40	University of Forestry, Sofia	Personally measured	42	42	Stoyan Stoyanov	Canis aureus	Bulgaria	Europe	Female
41	University of Forestry, Sofia	Personally measured	43	43	Stoyan Stoyanov	Canis aureus	Bulgaria	Europe	Male
42	University of Forestry, Sofia	Personally measured	44	44	Stoyan Stoyanov	Canis aureus	Bulgaria	Europe	Female
43	University of Forestry, Sofia	Personally measured	45	45	Stoyan Stoyanov	Canis aureus	Bulgaria	Europe	Male
44	University of Forestry, Sofia	Personally measured	46	46	Stoyan Stoyanov	Canis aureus	Bulgaria	Europe	Male
45	University of Forestry, Sofia	Personally measured	47	47	Stoyan Stoyanov	Canis aureus	Bulgaria	Europe	Male
46	University of Forestry, Sofia	Personally measured	48	48	Stoyan Stoyanov	Canis aureus	Bulgaria	Europe	Male
47	University of Forestry, Sofia	Personally measured	49	49	Stoyan Stoyanov	Canis aureus	Bulgaria	Europe	Male
48	University of Forestry, Sofia	Personally measured	50	50	Stoyan Stoyanov	Canis aureus	Bulgaria	Europe	Female
49	University of Forestry, Sofia	Personally measured	51	51	Stoyan Stoyanov	Canis aureus	Bulgaria	Europe	Female
50	University of Forestry, Sofia	Personally measured	52	52	Stoyan Stoyanov	Canis aureus	Bulgaria	Europe	Female
51	University of Forestry, Sofia	Personally measured	54	54	Stoyan Stoyanov	Canis aureus	Bulgaria	Europe	Male
52	University of Forestry, Sofia	Personally measured	55	55	Stoyan Stoyanov	Canis aureus	Bulgaria	Europe	Female
53	University of Forestry, Sofia	Personally measured	56	56	Stoyan Stoyanov	Canis aureus	Bulgaria	Europe	Male
54	University of Forestry, Sofia	Personally measured	57	57	Stoyan Stoyanov	Canis aureus	Bulgaria	Europe	Female
55	University of Forestry, Sofia	Personally measured	58	58	Stoyan Stoyanov	Canis aureus	Bulgaria	Europe	Female
56	University of Forestry, Sofia	Personally measured	59	59	Stoyan Stoyanov	Canis aureus	Bulgaria	Europe	Male
57	University of Forestry, Sofia	Personally measured	60	60	Stoyan Stoyanov	Canis aureus	Bulgaria	Europe	Female
58	University of Forestry, Sofia	Personally measured	61	61	Stoyan Stoyanov	Canis aureus	Bulgaria	Europe	Male
59	University of Forestry, Sofia	Personally measured	62	62	Stoyan Stoyanov	Canis aureus	Bulgaria	Europe	Male
60	University of Forestry, Sofia	Personally measured	63	63	Stoyan Stoyanov	Canis aureus	Bulgaria	Europe	Male
61	University of Forestry, Sofia	Personally measured	64	64	Stoyan Stoyanov	Canis aureus	Bulgaria	Europe	Female
62	University of Forestry, Sofia	Personally measured	65	65	Stoyan Stoyanov	Canis aureus	Bulgaria	Europe	Male
63	University of Forestry, Sofia	Personally measured	66	66	Stoyan Stoyanov	Canis aureus	Bulgaria	Europe	Male
64	University of Forestry, Sofia	Personally measured	67	67	Stoyan Stoyanov	Canis aureus	Bulgaria	Europe	Male
65	University of Forestry, Sofia	Personally measured	68	68	Stoyan Stoyanov	Canis aureus	Bulgaria	Europe	Male
66	University of Forestry, Sofia	Personally measured	69	69	Stoyan Stoyanov	Canis aureus	Bulgaria	Europe	Male
67	University of Forestry, Sofia	Personally measured	70	70	Stoyan Stoyanov	Canis aureus	Bulgaria	Europe	Male
68	University of Forestry, Sofia	Personally measured	71	71	Stoyan Stoyanov	Canis aureus	Bulgaria	Europe	Female
69	University of Forestry, Sofia	Personally measured	73	73	Stoyan Stoyanov	Canis aureus	Bulgaria	Europe	Female
70	University of Forestry, Sofia	Personally measured	75	75	Stoyan Stoyanov	Canis aureus	Bulgaria	Europe	Male
71	University of Forestry, Sofia	Personally measured	76	76	Stoyan Stoyanov	Canis aureus	Bulgaria	Europe
72	University of Forestry, Sofia	Personally measured	77	77	Stoyan Stoyanov	Canis aureus	Bulgaria	Europe	Male
73	University of Forestry, Sofia	Personally measured	78	78	Stoyan Stoyanov	Canis aureus	Bulgaria	Europe	Male
74	University of Forestry, Sofia	Personally measured	79	79	Stoyan Stoyanov	Canis aureus	Bulgaria	Europe	Female
75	University of Forestry, Sofia	Personally measured	80	80	Stoyan Stoyanov	Canis aureus	Bulgaria	Europe	Male
76	University of Forestry, Sofia	Personally measured	81	81	Stoyan Stoyanov	Canis aureus	Bulgaria	Europe	Male
77	University of Forestry, Sofia	Personally measured	82	82	Stoyan Stoyanov	Canis aureus	Bulgaria	Europe	Male
78	University of Forestry, Sofia	Personally measured	83	83	Stoyan Stoyanov	Canis aureus	Bulgaria	Europe	Male
79	University of Forestry, Sofia	Personally measured	84	84	Stoyan Stoyanov	Canis aureus	Bulgaria	Europe	Male
80	University of Forestry, Sofia	Personally measured	85	85	Stoyan Stoyanov	Canis aureus	Bulgaria	Europe	Male
81	University of Forestry, Sofia	Personally measured	86	86	Stoyan Stoyanov	Canis aureus	Bulgaria	Europe	Female
82	University of Forestry, Sofia	Personally measured	87	87	Stoyan Stoyanov	Canis aureus	Bulgaria	Europe
83	University of Forestry, Sofia	Personally measured	88	88	Stoyan Stoyanov	Canis aureus	Bulgaria	Europe
84	University of Forestry, Sofia	Personally measured	89	89	Stoyan Stoyanov	Canis aureus	Bulgaria	Europe	Female
85	University of Forestry, Sofia	Personally measured	90	90	Stoyan Stoyanov	Canis aureus	Bulgaria	Europe	Male
86	University of Forestry, Sofia	Personally measured	91	91	Stoyan Stoyanov	Canis aureus	Bulgaria	Europe	Female
87	University of Forestry, Sofia	Personally measured	92	92	Stoyan Stoyanov	Canis aureus	Bulgaria	Europe	Male
88	University of Forestry, Sofia	Personally measured	93	93	Stoyan Stoyanov	Canis aureus	Bulgaria	Europe	Female
89	University of Forestry, Sofia	Personally measured	94	94	Stoyan Stoyanov	Canis aureus	Bulgaria	Europe	Male
90	University of Forestry, Sofia	Personally measured	95	95	Stoyan Stoyanov	Canis aureus	Bulgaria	Europe	Male
91	National Museum of Natural History, Sofia	Personally measured		12	Stoyan Vassilev	Canis aureus	Bulgaria	Europe	Female
92	National Museum of Natural History, Sofia	Personally measured		93	Stoyan Vassilev	Canis aureus	Bulgaria	Europe	Male
93	National Museum of Natural History, Sofia	Personally measured		90	Stoyan Vassilev	Canis aureus	Bulgaria	Europe	Female
94	National Museum of Natural History, Sofia	Personally measured		88	Stoyan Vassilev	Canis aureus	Bulgaria	Europe	Female
95	National Museum of Natural History, Sofia	Personally measured		84	Stoyan Vassilev	Canis aureus	Bulgaria	Europe	Female
96	National Museum of Natural History, Sofia	Personally measured		82	Stoyan Vassilev	Canis aureus	Bulgaria	Europe	Male
97	National Museum of Natural History, Sofia	Personally measured		80	Stoyan Vassilev	Canis aureus	Bulgaria	Europe	Female
98	National Museum of Natural History, Sofia	Personally measured		76	Stoyan Vassilev	Canis aureus	Bulgaria	Europe	Female
99	National Museum of Natural History, Sofia	Personally measured		75	Stoyan Vassilev	Canis aureus	Bulgaria	Europe	Female
100	National Museum of Natural History, Sofia	Personally measured		67	Stoyan Vassilev	Canis aureus	Bulgaria	Europe	Male
101	National Museum of Natural History, Sofia	Personally measured		62	Stoyan Vassilev	Canis aureus	Bulgaria	Europe	Male
102	National Museum of Natural History, Sofia	Personally measured		55	Stoyan Vassilev	Canis aureus	Bulgaria	Europe	Female
103	National Museum of Natural History, Sofia	Personally measured		54	Stoyan Vassilev	Canis aureus	Bulgaria	Europe	Male
104	National Museum of Natural History, Sofia	Personally measured		53	Stoyan Vassilev	Canis aureus	Bulgaria	Europe	Female
105	National Museum of Natural History, Sofia	Personally measured		51	Stoyan Vassilev	Canis aureus	Bulgaria	Europe	Male
106	National Museum of Natural History, Sofia	Personally measured		41	Stoyan Vassilev	Canis aureus	Bulgaria	Europe	Female
107	National Museum of Natural History, Sofia	Personally measured		39	Stoyan Vassilev	Canis aureus	Bulgaria	Europe	Male
108	National Museum of Natural History, Sofia	Personally measured		34	Stoyan Vassilev	Canis aureus	Bulgaria	Europe	Female
109	National Museum of Natural History, Sofia	Personally measured		33	Stoyan Vassilev	Canis aureus	Bulgaria	Europe	Female
110	National Museum of Natural History, Sofia	Personally measured		30	Stoyan Vassilev	Canis aureus	Bulgaria	Europe	Male
111	National Museum of Natural History, Sofia	Personally measured		28	Stoyan Vassilev	Canis aureus	Bulgaria	Europe	Male
112	National Museum of Natural History, Sofia	Personally measured		24	Stoyan Vassilev	Canis aureus	Bulgaria	Europe	Female
113	National Museum of Natural History, Sofia	Personally measured		22	Stoyan Vassilev	Canis aureus	Bulgaria	Europe	Male
114	National Museum of Natural History, Sofia	Personally measured		21	Stoyan Vassilev	Canis aureus	Bulgaria	Europe	Female
115	National Museum of Natural History, Sofia	Personally measured		20	Stoyan Vassilev	Canis aureus	Bulgaria	Europe	Female
116	National Museum of Natural History, Sofia	Personally measured		16	Stoyan Vassilev	Canis aureus	Bulgaria	Europe	Female
117	National Museum of Natural History, Sofia	Personally measured		15	Stoyan Vassilev	Canis aureus	Bulgaria	Europe	Female
118	National Museum of Natural History, Sofia	Personally measured		13	Stoyan Vassilev	Canis aureus	Bulgaria	Europe	Male
119	National Museum of Natural History, Sofia	Personally measured		9	Stoyan Vassilev	Canis aureus	Bulgaria	Europe
120	National Museum of Natural History, Sofia	Personally measured		6	Stoyan Vassilev	Canis aureus	Bulgaria	Europe	Male
121	National Museum of Natural History, Sofia	Personally measured		89	Stoyan Vassilev	Canis aureus	Bulgaria	Europe	Male
122	National Museum of Natural History, Sofia	Personally measured		78	Stoyan Vassilev	Canis aureus	Bulgaria	Europe	Female
123	National Museum of Natural History, Sofia	Personally measured		77	Stoyan Vassilev	Canis aureus	Bulgaria	Europe	Male
124	National Museum of Natural History, Sofia	Personally measured		63	Stoyan Vassilev	Canis aureus	Bulgaria	Europe	Male
125	National Museum of Natural History, Sofia	Personally measured		52	Stoyan Vassilev	Canis aureus	Bulgaria	Europe	Male
126	National Museum of Natural History, Sofia	Personally measured		29	Stoyan Vassilev	Canis aureus	Bulgaria	Europe	Male
127	National Museum of Natural History, Sofia	Personally measured		19	Stoyan Vassilev	Canis aureus	Bulgaria	Europe	Male
128	National Museum of Natural History, Sofia	Personally measured		7	Stoyan Vassilev	Canis aureus	Bulgaria	Europe	Male
129	National Museum of Natural History, Sofia	Personally measured		2	Stoyan Vassilev	Canis aureus	Bulgaria	Europe	Female
130	National Museum of Natural History, Sofia	Personally measured		8	Stoyan Vassilev	Canis aureus	Bulgaria	Europe	Female
131	National Museum of Natural History, Sofia	Personally measured		7a	Stoyan Vassilev	Canis aureus	Bulgaria	Europe	Female
132	National Museum of Natural History, Sofia	Personally measured	RM577		Stoyan Vassilev	Canis aureus	Bulgaria	Europe	Female
133	National Museum of Natural History, Sofia	Personally measured	RM573		Stoyan Vassilev	Canis aureus	Bulgaria	Europe	Female
134	National Museum of Natural History, Sofia	Personally measured	RM571	42	Stoyan Vassilev	Canis aureus	Bulgaria	Europe	Male
135	National Museum of Natural History, Sofia	Personally measured	RM564	35	Stoyan Vassilev	Canis aureus	Bulgaria	Europe	Male
136	National Museum of Natural History, Sofia	Personally measured	RM560	38	Stoyan Vassilev	Canis aureus	Bulgaria	Europe	Female
137	National Museum of Natural History, Sofia	Personally measured	RM574	23	Stoyan Vassilev	Canis aureus	Bulgaria	Europe	Female
138	National Museum of Natural History, Sofia	Personally measured	RM566	17	Stoyan Vassilev	Canis aureus	Bulgaria	Europe	Male
139	National Museum of Natural History, Sofia	Personally measured	RM565	9a	Stoyan Vassilev	Canis aureus	Bulgaria	Europe	Female
140	National Museum of Natural History, Sofia	Personally measured	RM561		Stoyan Vassilev	Canis aureus	Bulgaria	Europe	Male
141	National Museum of Natural History, Sofia	Personally measured	RM578	65	Stoyan Vassilev	Canis aureus	Bulgaria	Europe	Male
142	National Museum of Natural History, Sofia	Personally measured	RM568	44	Stoyan Vassilev	Canis aureus	Bulgaria	Europe	Female
143	National Museum of Natural History, Sofia	Personally measured	RM570		Stoyan Vassilev	Canis aureus	Bulgaria	Europe	Female
144	National Museum of Natural History, Sofia	Personally measured	RM567	48	Stoyan Vassilev	Canis aureus	Bulgaria	Europe	Male
145	National Museum of Natural History, Sofia	Personally measured		18	Stoyan Vassilev	Canis aureus	Bulgaria	Europe	Male
146	National Museum of Natural History, Sofia	Personally measured	RM569	32	Stoyan Vassilev	Canis aureus	Bulgaria	Europe	Male
147	National Museum of Natural History, Sofia	Personally measured	RM562	37	Stoyan Vassilev	Canis aureus	Bulgaria	Europe	Male
148	National Museum of Natural History, Sofia	Personally measured	RM563	61	Stoyan Vassilev	Canis aureus	Bulgaria	Europe	Female
149	National Museum of Natural History, Sofia	Personally measured	RM576	36	Stoyan Vassilev	Canis aureus	Bulgaria	Europe	Female
150	National Museum of Natural History, Sofia	Personally measured	RM575	60	Stoyan Vassilev	Canis aureus	Bulgaria	Europe	Male
151	National Museum of Natural History, Sofia	Personally measured	RM278			Canis aureus	Bulgaria	Europe	Male
152	National Museum of Natural History, Sofia	Personally measured	RM522			Canis aureus	Bulgaria	Europe	Male
153	National Museum of Natural History, Sofia	Personally measured	RM479			Canis aureus	Bulgaria	Europe	Female
154	National Museum of Natural History, Sofia	Personally measured	RM608		V. Minekov	Canis aureus	Bulgaria	Europe	Male
155	National Museum of Natural History, Sofia	Personally measured	RM528			Canis aureus	Bulgaria	Europe	Male
156	National Museum of Natural History, Sofia	Personally measured	RM268		O. Borisov	Canis aureus	Bulgaria	Europe	Male
157	National Museum of Natural History, Sofia	Personally measured	RM189		D. Haralampiev	Canis aureus	Bulgaria	Europe	Male
158	National Museum of Natural History, Sofia	Personally measured	RM527			Canis aureus	Bulgaria	Europe
159	National Museum of Natural History, Sofia	Personally measured	RM185			Canis aureus	Bulgaria	Europe	Male
160	National Museum of Natural History, Sofia	Personally measured	RM182			Canis aureus	Bulgaria	Europe	Male
161	National Museum of Natural History, Sofia	Personally measured	RM454			Canis aureus	Bulgaria	Europe	Female
162	National Museum of Natural History, Sofia	Personally measured	RM184			Canis aureus	Bulgaria	Europe	Female
163	National Museum of Natural History, Sofia	Personally measured	RM198			Canis aureus	Bulgaria	Europe	Male
164	National Museum of Natural History, Sofia	Personally measured	RM525			Canis aureus	Bulgaria	Europe	Male
165	National Museum of Natural History, Sofia	Personally measured	RM523			Canis aureus	Bulgaria	Europe
166	National Museum of Natural History, Sofia	Personally measured	RM526			Canis aureus	Bulgaria	Europe
167	National Museum of Natural History, Sofia	Personally measured	RM451			Canis aureus	Bulgaria	Europe	Male
168	National Museum of Natural History, Sofia	Personally measured	RM183			Canis aureus	Bulgaria	Europe	Male
169	National Museum of Natural History, Sofia	Personally measured				Canis aureus	Bulgaria	Europe	Male
170	National Museum of Natural History, Sofia	Personally measured	RM187		Grigor Grigorov	Canis aureus	Bulgaria	Europe	Male
171	National Museum of Natural History, Sofia	Personally measured	RM1151		D. Petkov	Canis aureus	Bulgaria	Europe	Female
172	National Museum of Natural History, Sofia	Personally measured				Canis aureus	Bulgaria	Europe
173	National Museum of Natural History, Sofia	Personally measured	RM524			Canis aureus	Bulgaria	Europe	Male
174	National Museum of Natural History, Sofia	Personally measured	RM200			Canis aureus	Bulgaria	Europe
175	National Museum of Natural History, Sofia	Personally measured	RM529			Canis aureus	Bulgaria	Europe	Male
176	Sixth National Trophy Exhibition, Plovdiv 2013	Personally measured	30		Dimitar Rusev	Canis aureus	Bulgaria	Europe	Male
177	Sixth National Trophy Exhibition, Plovdiv 2013	Personally measured	27		Dimitar Rusev	Canis aureus	Bulgaria	Europe	Male
178	Sixth National Trophy Exhibition, Plovdiv 2013	Personally measured			Todor Kasnakov	Canis aureus	Bulgaria	Europe
179	Sixth National Trophy Exhibition, Plovdiv 2013	Personally measured	29		Dimitar Rusev	Canis aureus	Bulgaria	Europe	Male
180	Sixth National Trophy Exhibition, Plovdiv 2013	Personally measured			Dimitar Rusev	Canis aureus	Bulgaria	Europe	Male
181	Sixth National Trophy Exhibition, Plovdiv 2013	Personally measured			Dimitar Nanchev	Canis aureus	Bulgaria	Europe	Male
182	Sixth National Trophy Exhibition, Plovdiv 2013	Personally measured	32		Dimitar Nanchev	Canis aureus	Bulgaria	Europe	Male
183	Sixth National Trophy Exhibition, Plovdiv 2013	Personally measured			Dimitar Nanchev	Canis aureus	Bulgaria	Europe	Female
184	Sixth National Trophy Exhibition, Plovdiv 2013	Personally measured	31		Dimitar Nanchev	Canis aureus	Bulgaria	Europe	Male
185	Sixth National Trophy Exhibition, Plovdiv 2013	Personally measured	11		Rosen Mirchev	Canis aureus	Bulgaria	Europe	Male
186	Sixth National Trophy Exhibition, Plovdiv 2013	Personally measured	30		Rosen Mirchev	Canis aureus	Bulgaria	Europe	Male
187	Sixth National Trophy Exhibition, Plovdiv 2013	Personally measured			Nikolay Petkov	Canis aureus	Bulgaria	Europe	Male
188	Sixth National Trophy Exhibition, Plovdiv 2013	Personally measured			Neven Karavasilev	Canis aureus	Bulgaria	Europe	Male
189	Sixth National Trophy Exhibition, Plovdiv 2013	Personally measured			Rosen Mirchev	Canis aureus	Bulgaria	Europe	Female
190	Sixth National Trophy Exhibition, Plovdiv 2013	Personally measured			M. Georgiev	Canis aureus	Bulgaria	Europe
191	Sixth National Trophy Exhibition, Plovdiv 2013	Personally measured			M. Georgiev	Canis aureus	Bulgaria	Europe
192	Sixth National Trophy Exhibition, Plovdiv 2013	Personally measured			M. Georgiev	Canis aureus	Bulgaria	Europe
193	Sixth National Trophy Exhibition, Plovdiv 2013	Personally measured			Neven Karavasilev	Canis aureus	Bulgaria	Europe
194	Sixth National Trophy Exhibition, Plovdiv 2013	Personally measured			Petar Petrov	Canis aureus	Bulgaria	Europe
195	Sixth National Trophy Exhibition, Plovdiv 2013	Personally measured			Rosen Mirchev	Canis aureus	Bulgaria	Europe	Male
196	Sixth National Trophy Exhibition, Plovdiv 2013	Personally measured			Rosen Mirchev	Canis aureus	Bulgaria	Europe	Female
197	Sixth National Trophy Exhibition, Plovdiv 2013	Personally measured			Grigor Gogov	Canis aureus	Bulgaria	Europe
198	Sixth National Trophy Exhibition, Plovdiv 2013	Personally measured			Grigor Gogov	Canis aureus	Bulgaria	Europe
199	National Museum of Natural History, Sofia	Demeter and Spassov				Canis aureus	Bulgaria	Europe	Female
200	National Museum of Natural History, Sofia	Demeter and Spassov				Canis aureus	Bulgaria	Europe	Male
201	National Museum of Natural History, Sofia	Demeter and Spassov	13			Canis aureus	Bulgaria	Europe	Male
202	National Museum of Natural History, Sofia	Demeter and Spassov	27			Canis aureus	Bulgaria	Europe	Male
203	National Museum of Natural History, Sofia	Demeter and Spassov	28			Canis aureus	Bulgaria	Europe	Female
204	National Museum of Natural History, Sofia	Demeter and Spassov	123			Canis aureus	Bulgaria	Europe	Male
205	Hungarian Natural History Museum, Budapest	Demeter and Spassov	4097			Canis aureus	Hungary	Europe	Male
206	Hungarian Natural History Museum, Budapest	Demeter and Spassov	83.66.1			Canis aureus	Hungary	Europe	Male
207	Hungarian Natural History Museum, Budapest	Demeter and Spassov	83.67.1			Canis aureus	Hungary	Europe	Male
208	Hungarian Natural History Museum, Budapest	Demeter and Spassov	57.33.1			Canis aureus	Croatia	Europe	Female
209	Hungarian Natural History Museum, Budapest	Demeter and Spassov	57.33.2			Canis aureus	Croatia	Europe	Female
210	Natural History Museum, Vienna	Kryštufek and Tvrtković	1097		Dr. Bakis & L. von Führer	Canis aureus	Croatia	Europe
211	Natural History Museum, Vienna	Kryštufek and Tvrtković	1102		Desulović	Canis aureus	Croatia	Europe
212	Natural History Museum, Vienna	Kryštufek and Tvrtković	1897			Canis aureus	Croatia	Europe	Male
213	Natural History Museum, Vienna	Kryštufek and Tvrtković	1898			Canis aureus	Croatia	Europe	Male
214	Natural History Museum, Vienna	Kryštufek and Tvrtković	4756LJ		from L. Jeitelles collection	Canis aureus	Croatia	Europe	Male
215	Natural History Museum, Vienna	Kryštufek and Tvrtković	4849		Buratović	Canis aureus	Croatia	Europe	Female
216	Natural History Museum, Vienna	Kryštufek and Tvrtković	4854		Dr. Bakis & L. von Führer	Canis aureus	Croatia	Europe
217	Natural History Museum, Vienna	Kryštufek and Tvrtković			Buratović	Canis aureus	Croatia	Europe	Male
218	Natural History Museum, Vienna	Kryštufek and Tvrtković	7153		Buratović	Canis aureus	Croatia	Europe	Female
219	Natural History Museum, Vienna	Kryštufek and Tvrtković	37608		B. Kryštufek	Canis aureus	Croatia	Europe	Male
220	Natural History Museum of Slovenia, Ljubljana	Kryštufek and Tvrtković	2883		B. Kryštufek	Canis aureus	Croatia	Europe	Female
221	Natural History Museum of Slovenia, Ljubljana	Kryštufek and Tvrtković	2884		B. Kryštufek	Canis aureus	Croatia	Europe
222	Natural History Museum of Slovenia, Ljubljana	Kryštufek and Tvrtković	3282		B. Kryštufek	Canis aureus	Croatia	Europe	Male
223	Natural History Museum of Slovenia, Ljubljana	Kryštufek and Tvrtković	3511			Canis aureus	Croatia	Europe
224	Croatian Natural History Museum, Zagreb	Kryštufek and Tvrtković	910		K. Igalffy	Canis aureus	Croatia	Europe	Male
225	Croatian Natural History Museum, Zagreb	Kryštufek and Tvrtković	3701NT		N. Tvrtković	Canis aureus	Croatia	Europe	Female
226	Natural History Museum, London	Demeter and Spassov	8.10.2.50			Canis aureus	Greece	Europe
227	Natural History Museum, London	Demeter and Spassov	44.7.13.3			Canis aureus	Greece	Europe
228	Natural History Museum, London	Demeter and Spassov	6.5.1.31			Canis aureus	Turkey	Asia Minor	Male
229	Natural History Museum, London	Demeter and Spassov	6.5.1.32			Canis aureus	Turkey	Asia Minor	Male
230	Natural History Museum, London	Demeter and Spassov	6.5.1.33			Canis aureus	Turkey	Asia Minor	Female
231	Natural History Museum, London	Demeter and Spassov	6.5.1.34			Canis aureus	Turkey	Asia Minor	Female
232	Natural History Museum, London	Demeter and Spassov	6.5.1.35			Canis aureus	Turkey	Asia Minor	Female
233	Natural History Museum, London	Demeter and Spassov	4.9.15.4			Canis aureus	Turkey	Asia Minor	Female
234	Natural History Museum, Vienna	Kryštufek and Tvrtković	4759		from L. Jeitelles collection	Canis aureus	Turkey	Asia Minor	Male
235	Natural History Museum, Vienna	Kryštufek and Tvrtković	4760		from L. Jeitelles collection	Canis aureus	Turkey	Asia Minor	Female
236	Natural History Museum, Vienna	Kryštufek and Tvrtković	1350		K. Jüttner	Canis aureus	Georgia	The Caucasus, Asia
237	National Museum of Natural History, Sofia	Personally measured			from Stoyan Vassilev collection	Canis aureus		The Caucasus, Asia	Female
238	National Museum of Natural History, Sofia	Personally measured			from Stoyan Vassilev collection	Canis aureus		The Caucasus, Asia	Male
239	Natural History Museum, Vienna	Demeter and Spassov	1350			Canis aureus		The Caucasus, Asia
240	Natural History Museum, Vienna	Demeter and Spassov	79.11.15.3			Canis aureus		The Caucasus, Asia	Female
241	Natural History Museum, Vienna	Kryštufek and Tvrtković	1083		from Spatz collection	Canis 'anthus' s. str.	Tunisia	Africa	Male
242	Natural History Museum, Vienna	Kryštufek and Tvrtković	1085		from Spatz collection	Canis 'anthus' s. str.	Tunisia	Africa	Male
243	Natural History Museum, Vienna	Kryštufek and Tvrtković	1152		Reitz	Canis 'anthus' s. str.	Sudan	Africa
244	Natural History Museum, Vienna	Kryštufek and Tvrtković	1738		Nemec	Canis 'anthus' s. str.	Ethiopia	Africa	Female
245	Natural History Museum, Vienna	Kryštufek and Tvrtković	1937		Nemec	Canis 'anthus' s. str.	Ethiopia	Africa	Female
246	Natural History Museum, Vienna	Kryštufek and Tvrtković	3152		A. Weidholz	Canis 'anthus' s. str.	Tunisia	Africa
247	Natural History Museum, Vienna	Kryštufek and Tvrtković	3341		C. Hilgert	Canis 'anthus' s. str.	Ethiopia	Africa	Female
248	Natural History Museum, Vienna	Kryštufek and Tvrtković	3343		C. Freiherr von Erlanger	Canis 'anthus' s. str.	Ethiopia	Africa	Male
249	Natural History Museum, Vienna	Kryštufek and Tvrtković	3345		C. Freiherr von Erlanger	Canis 'anthus' s. str.	Ethiopia	Africa	Male
250	Natural History Museum, Vienna	Kryštufek and Tvrtković	3347		C. Freiherr von Erlanger	Canis 'anthus' s. str.	Ethiopia	Africa	Male
251	Natural History Museum, Vienna	Kryštufek and Tvrtković	4839		C. Freiherr von Erlanger	Canis 'anthus' s. str.	Ethiopia	Africa	Male
252	Natural History Museum, Vienna	Kryštufek and Tvrtković	4845		Zoological Garden Schönbrunn	Canis 'anthus' s. str.	Libya	Africa	Male
253	Natural History Museum, Vienna	Kryštufek and Tvrtković	7422		A. Weidholz	Canis 'anthus' s. str.	Tunisia	Africa
254	Natural History Museum, Vienna	Kryštufek and Tvrtković	7423		A. Weidholz	Canis 'anthus' s. str.	Tunisia	Africa
255	Natural History Museum, Vienna	Kryštufek and Tvrtković	7424		A. Weidholz	Canis 'anthus' s. str.	Tunisia	Africa
256	Natural History Museum, Vienna	Kryštufek and Tvrtković	7425		A. Weidholz	Canis 'anthus' s. str.	Tunisia	Africa
257	Natural History Museum, Vienna	Kryštufek and Tvrtković	7426		A. Weidholz	Canis 'anthus' s. str.	Tunisia	Africa	Female
258	Natural History Museum, Vienna	Kryštufek and Tvrtković	7427		from L. Jeitelles collection	Canis 'anthus' s. str.	Algeria	Africa
259	Natural History Museum, Vienna	Kryštufek and Tvrtković	30266		F. Spitzenberger & al. Haniyah	Canis 'anthus' s. str.	Libya	Africa
260	Natural History Museum, Vienna	Kryštufek and Tvrtković	1133		Zoological Garden Schönbrunn	Canis 'lupaster' s. str.	Egypt	Africa
261	Natural History Museum, Vienna	Kryštufek and Tvrtković	4765		E. Hodek	Canis 'lupaster' s. str.	Egypt	Africa
262	Natural History Museum, Vienna	Kryštufek and Tvrtković	7152		Dr. C. Told	Canis 'lupaster' s. str.	Sudan	Africa	Male
263	Natural History Museum, Vienna	Kryštufek and Tvrtković	7154		Nemec	Canis 'lupaster' s. str.	Egypt	Africa
264	Natural History Museum, Vienna	Kryštufek and Tvrtković	7155		Nemec	Canis 'lupaster' s. str.	Egypt	Africa	Male
265	National Museum of Natural History, Sofia	Personally measured	RM244		Petar Genov	Canis 'lupaster' s. str.	Algeria	Africa	Male
266	National Museum of Natural History, Sofia	Personally measured	RM245		Petar Genov	Canis 'lupaster' s. str.	Algeria	Africa	Male
267	National Museum of Natural History, Sofia	Personally measured	RM246		Petar Genov	Canis 'lupaster' s. str.	Algeria	Africa	Male
268	National Museum of Natural History, Sofia	Personally measured	RM247		Petar Genov	Canis 'lupaster' s. str.	Algeria	Africa	Male
269	National Museum of Natural History, Sofia	Personally measured	RM248		Petar Genov	Canis 'lupaster' s. str.	Algeria	Africa	Female
270	National Museum of Natural History, Sofia	Personally measured	RM249		Petar Genov	Canis 'lupaster' s. str.	Algeria	Africa
271	National Museum of Natural History, Sofia	Personally measured	RM250		Petar Genov	Canis 'lupaster' s. str.	Algeria	Africa	Female
272	National Museum of Natural History, Sofia	Personally measured	RM251		Petar Genov	Canis 'lupaster' s. str.	Algeria	Africa	Female
273	National Museum of Natural History, Sofia	Personally measured	RM370		Petar Genov	Canis 'lupaster' s. str.	Algeria	Africa	Male
274	National Museum of Natural History, Sofia	Personally measured			Petar Genov	Canis 'lupaster' s. str.	Algeria	Africa	Male
275	National Museum of Natural History, Sofia	Personally measured	RM372		Petar Genov	Canis 'lupaster' s. str.	Algeria	Africa
276	National Museum of Natural History, Sofia	Personally measured	RM373		Petar Genov	Canis 'lupaster' s. str.	Algeria	Africa	Female
277	National Museum of Natural History, Sofia	Personally measured	RM374		Petar Genov	Canis 'lupaster' s. str.	Algeria	Africa	Male
278	National Museum of Natural History, Sofia	Personally measured	RM510		Petar Genov	Canis 'lupaster' s. str.	Algeria	Africa	Male
279	National Museum of Natural History, Sofia	Personally measured	RM511		Petar Genov	Canis 'lupaster' s. str.	Algeria	Africa	Male
280	National Museum of Natural History, Sofia	Personally measured	RM512		Petar Genov	Canis 'lupaster' s. str.	Algeria	Africa	Male
281	National Museum of Natural History, Sofia	Personally measured	RM513		Petar Genov	Canis 'lupaster' s. str.	Algeria	Africa	Male
282	National Museum of Natural History, Sofia	Personally measured	RM514		Petar Genov	Canis 'lupaster' s. str.	Algeria	Africa	Female
283	National Museum of Natural History, Sofia	Personally measured	RM515		Petar Genov	Canis 'lupaster' s. str.	Algeria	Africa	Male
284	National Museum of Natural History, Sofia	Personally measured	RM619		Petar Genov	Canis 'lupaster' s. str.	Algeria	Africa	Female
285	National Museum of Natural History, Sofia	Personally measured	RM620		Petar Genov	Canis 'lupaster' s. str.	Algeria	Africa	Female
